# Supplementary material for: Reconstruction and dissolution of shape-controlled Pt nanoparticles in acidic electrolytes
Source: Royal Society of Chemistry journal article supplement (doi:10.1039/c5cp07832f), 2016-01-01
Supplement: c5cp07832f1.pdf [file c5cp07832f1.pdf]

**Supporting Information**

**Reconstruction and dissolution of shape-controlled Pt nanoparticles in acidic electrolytes**

**Ruttala Devivaraprasad, Tathagata Kar, Arup Chakraborty, Ramesh Kumar Singh, and**

**Manoj Neergat\***

Department of Energy Science and Engineering, Indian Institute of Technology Bombay (IITB),

Powai, Mumbai-400076, India

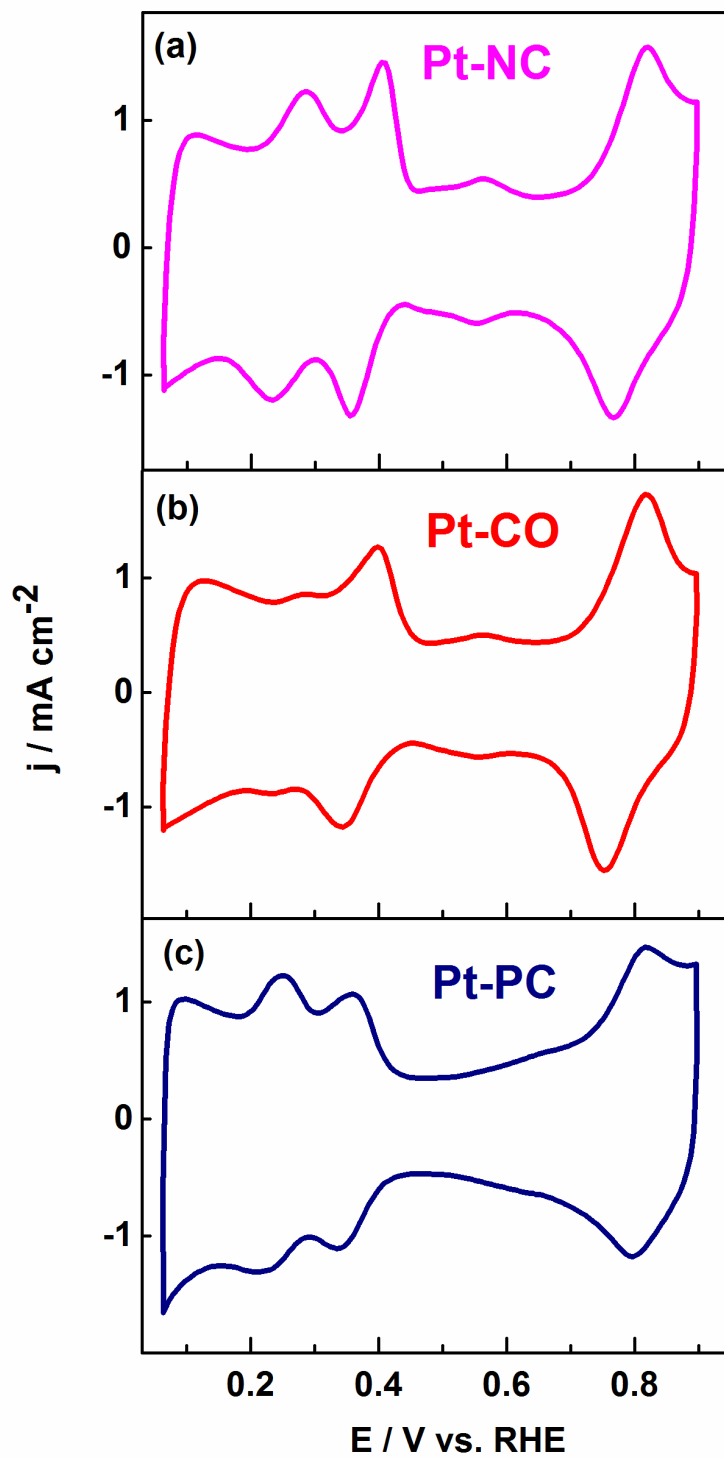

*Fig. S1 CVs of Pt-NC (a), Pt-CO (b) and Pt-PC (c) nanoparticles in argon-saturated 0.1 M NaOH electrolyte recorded at a scan rate of  $50 \text{ mV s}^{-1}$ .*

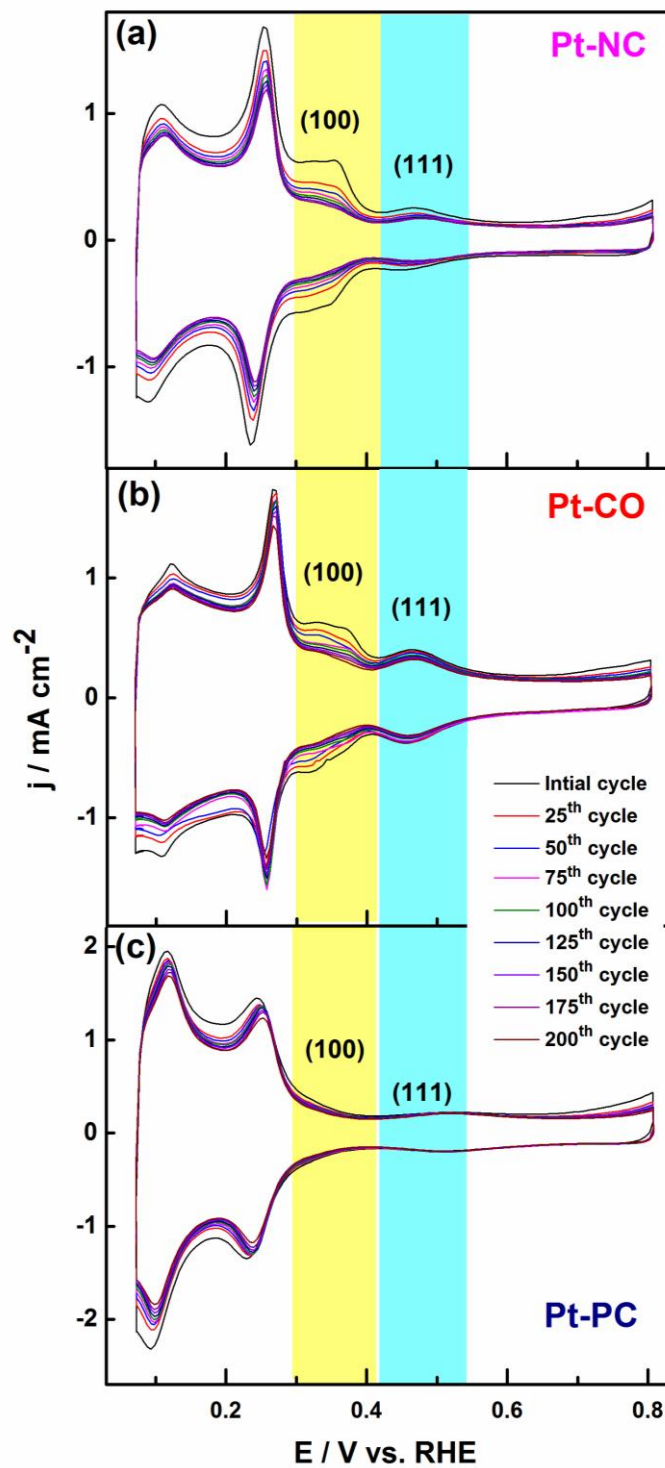

**Fig. S2** Voltammograms of Pt-PC (a), Pt-NC (b) and Pt-CO (c) nanoparticles upto 0.8 V (25<sup>th</sup> cycle upto 200<sup>th</sup> cycle) in argon-saturated 0.5 M  $\text{H}_2\text{SO}_4$  electrolyte recorded at a scan rate of 50  $\text{mV s}^{-1}$ .

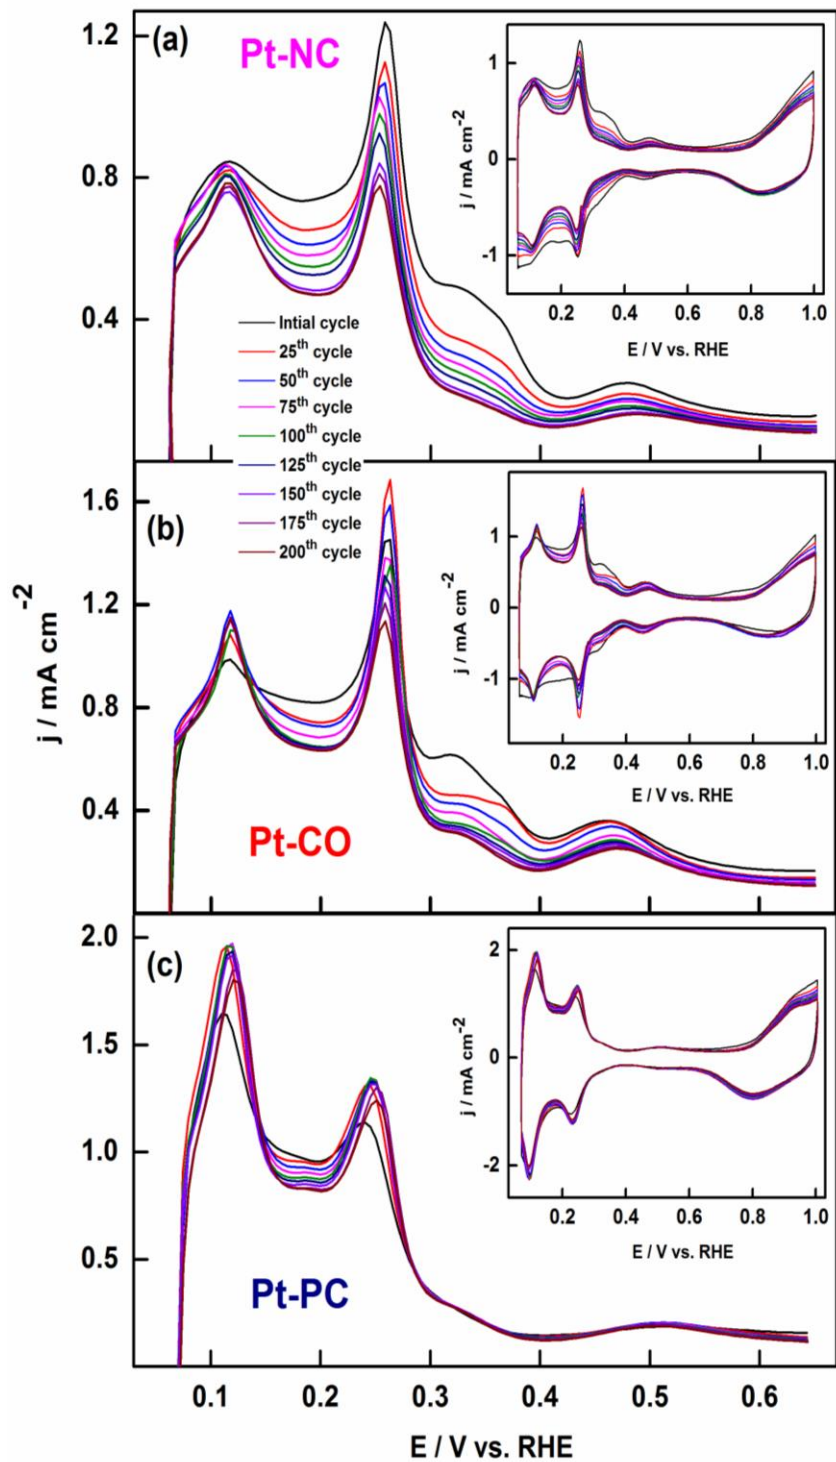

**Fig. S3**  $H_{upd}$  region of the voltammograms of Pt-NC (a), Pt-CO (b), and Pt-PC (c) nanoparticles in argon-saturated 0.5 M  $\text{H}_2\text{SO}_4$  electrolyte (every 25<sup>th</sup> cycle up to 200 cycles). Inset shows the respective complete voltammograms on cycling up to 1.0 V recorded at a scan rate of  $50 \text{ mV s}^{-1}$ .

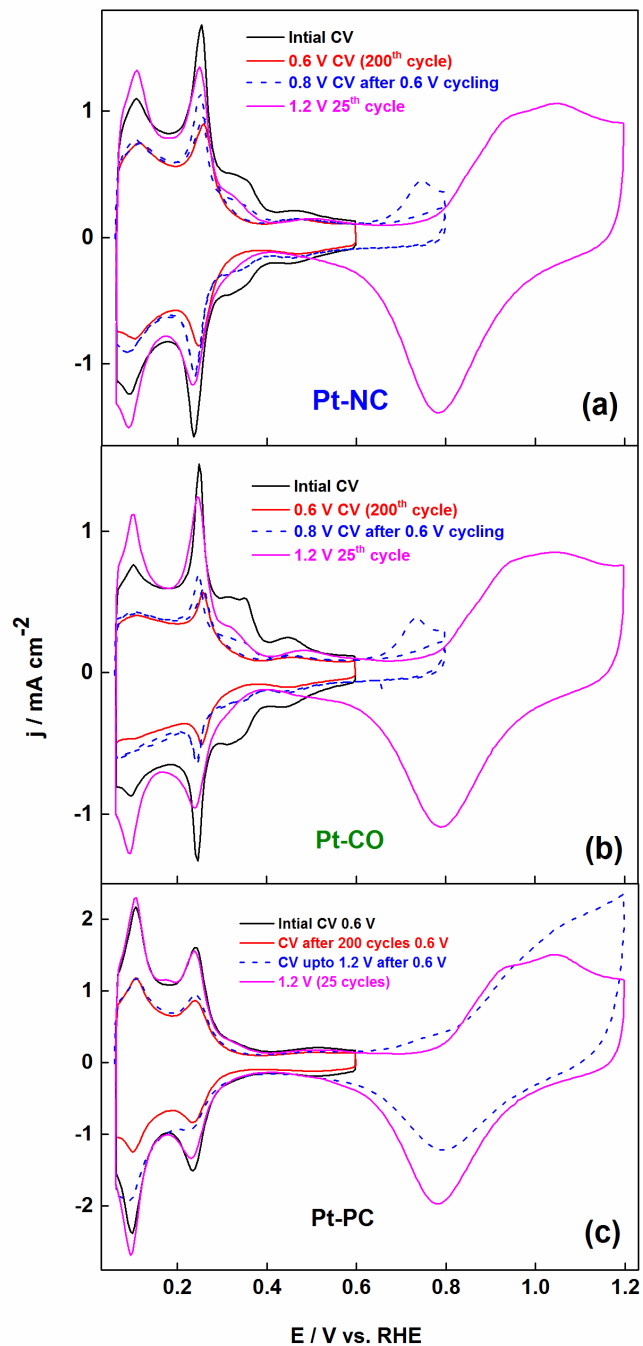

**Fig. S4** Comparison of the CVs (initial and after 0.6 V cycling (200 cycles)) followed by the CVs recorded upto 0.8 V (2 cycles) and 1.2 V (25<sup>th</sup> cycle) of Pt-NC (a), Pt-CO (b), and Pt-PC (c) at scan rate of  $50 \text{ mV s}^{-1}$  in test electrolyte  $\text{H}_2\text{SO}_4$  prepared using Ultrapur water (Wasser Agua Eau Água Aqua) obtained from Merck.

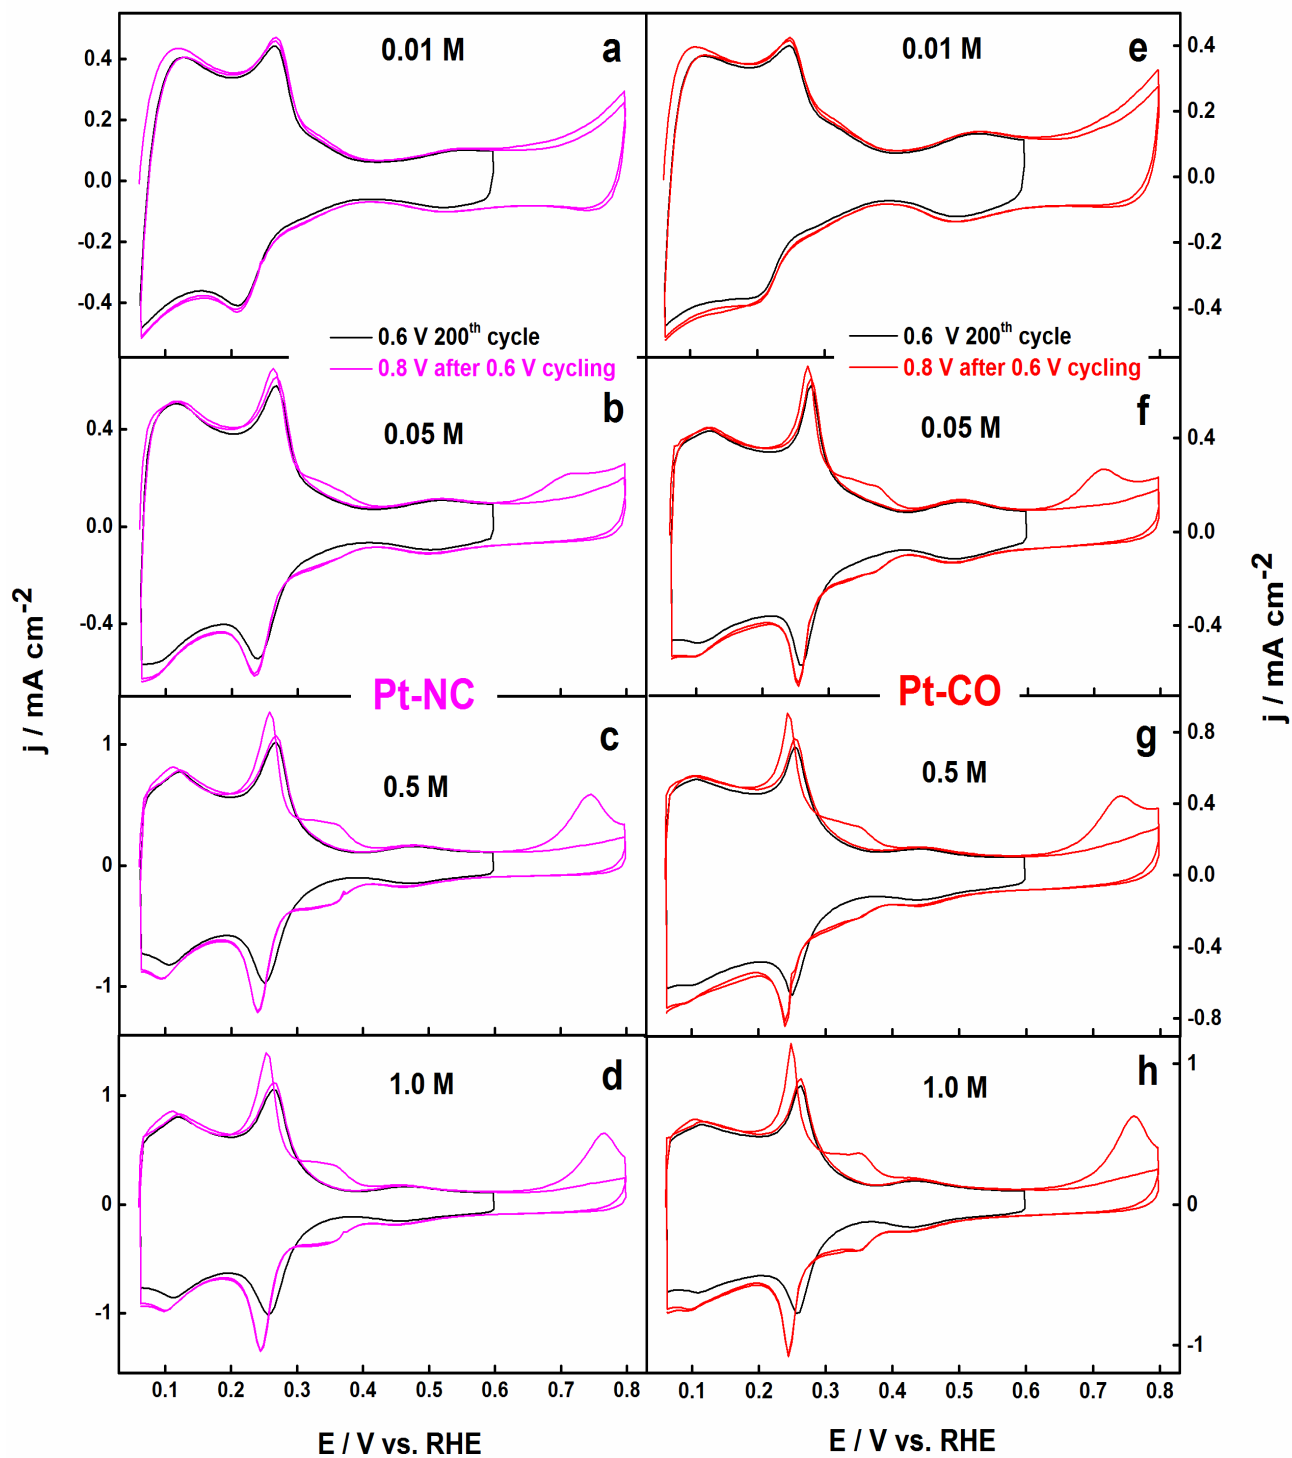

**Fig. S5** Comparison of CVs after 0.6 V cycling (200<sup>th</sup> cycle) and CVs after excursion to 0.8 V (2 cycles) with change in concentration of the test electrolyte H<sub>2</sub>SO<sub>4</sub>; left panel Pt-NC and right panel Pt-CO.

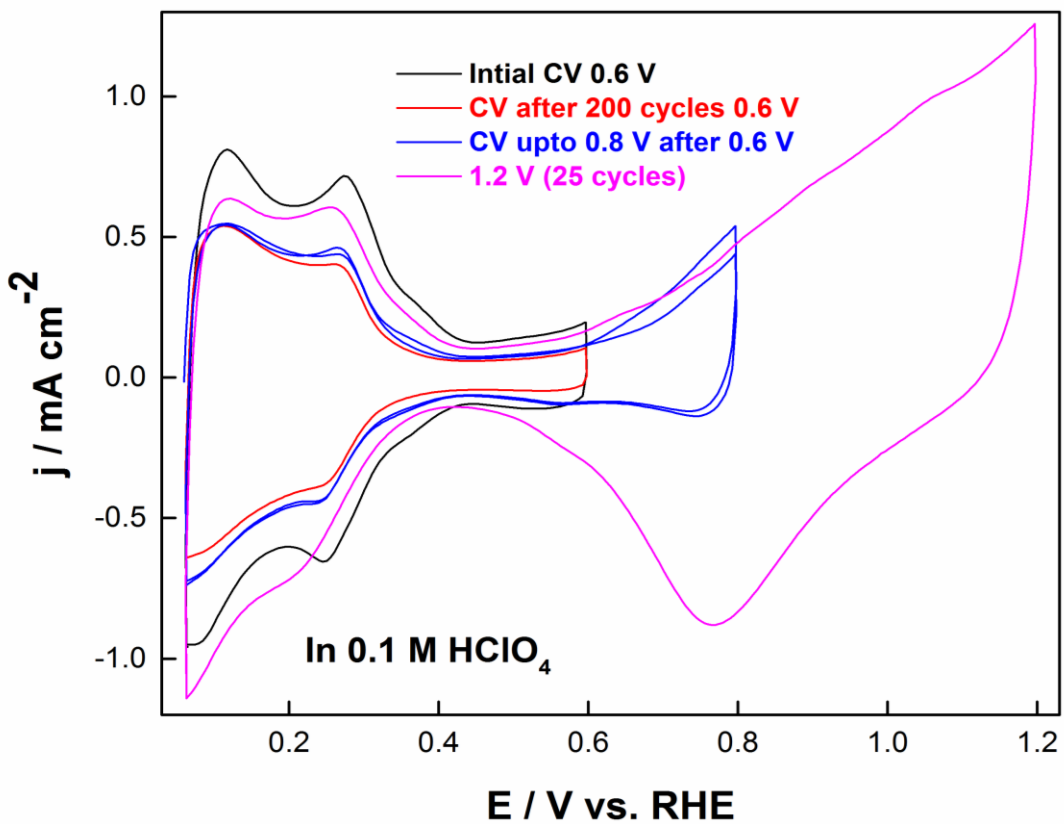

**Fig. S6** Comparison of the CVs (initial and after 0.6 V cycling (200 cycles)) followed by recording the CV upto 0.8 V (2 cycles) and 1.2 V (25<sup>th</sup> cycle) of Pt-NC in 0.1 M HClO<sub>4</sub> electrolyte recorded at a scan rate of 50 mV s<sup>-1</sup>.

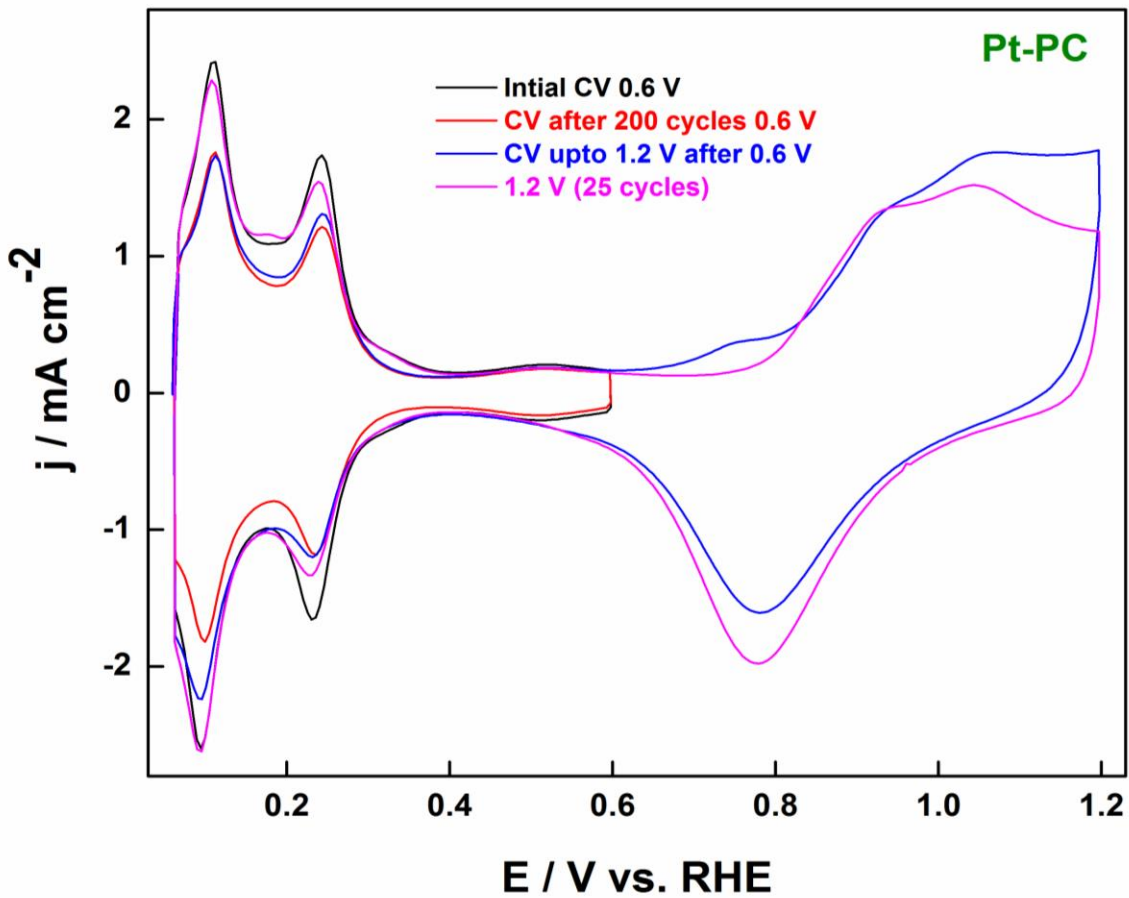

*Fig. S7 Comparison of the CVs of Pt-PC (intial and after 0.6 V cycling (200 cycles)) followed by recording the CV upto 1.2 V and 1.2 V 25<sup>th</sup> cycle in 0.5 M H<sub>2</sub>SO<sub>4</sub> electrolyte recorded at a scan rate of 50 mV s<sup>-1</sup>.*



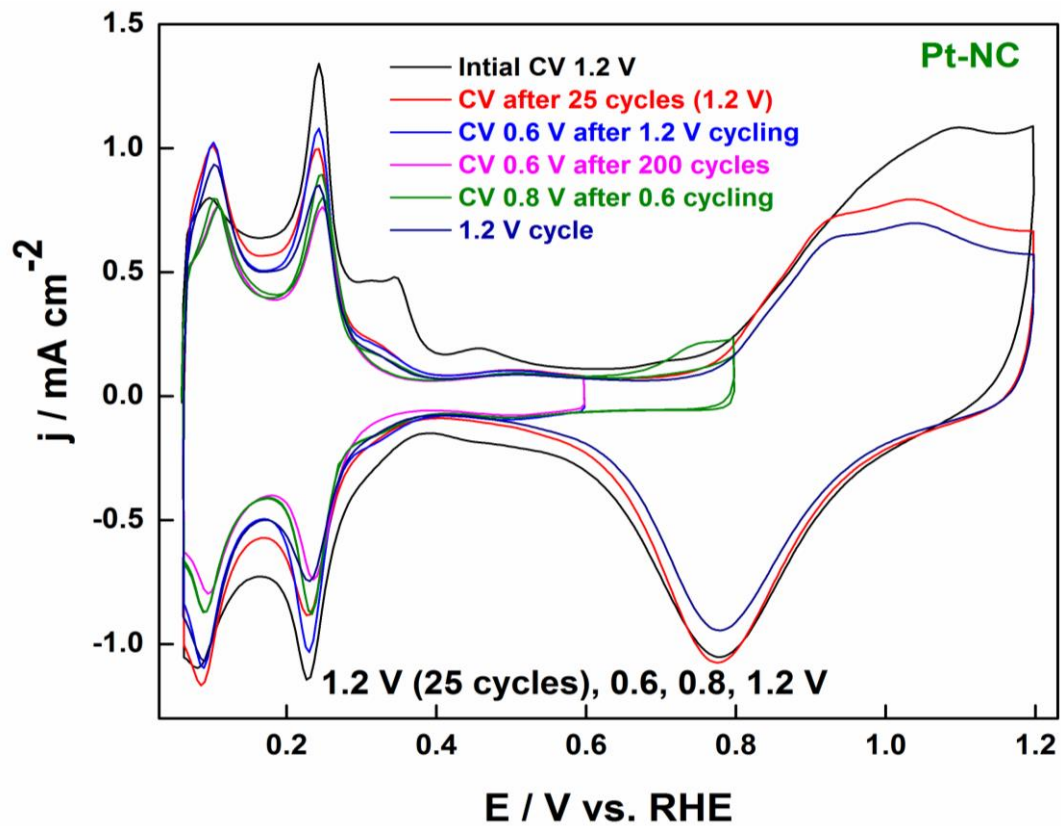

**Fig. S8** Comparison of the CVs of Pt-NC (initial and after 1.2 V cycling (25 cycles)) followed by recording the CV upto 0.6 V (200 cycles) and 0.8 V (2 cycles) and 1.2 V in 0.5 M H<sub>2</sub>SO<sub>4</sub> electrolyte recorded at a scan rate of 50 mV s<sup>-1</sup>.

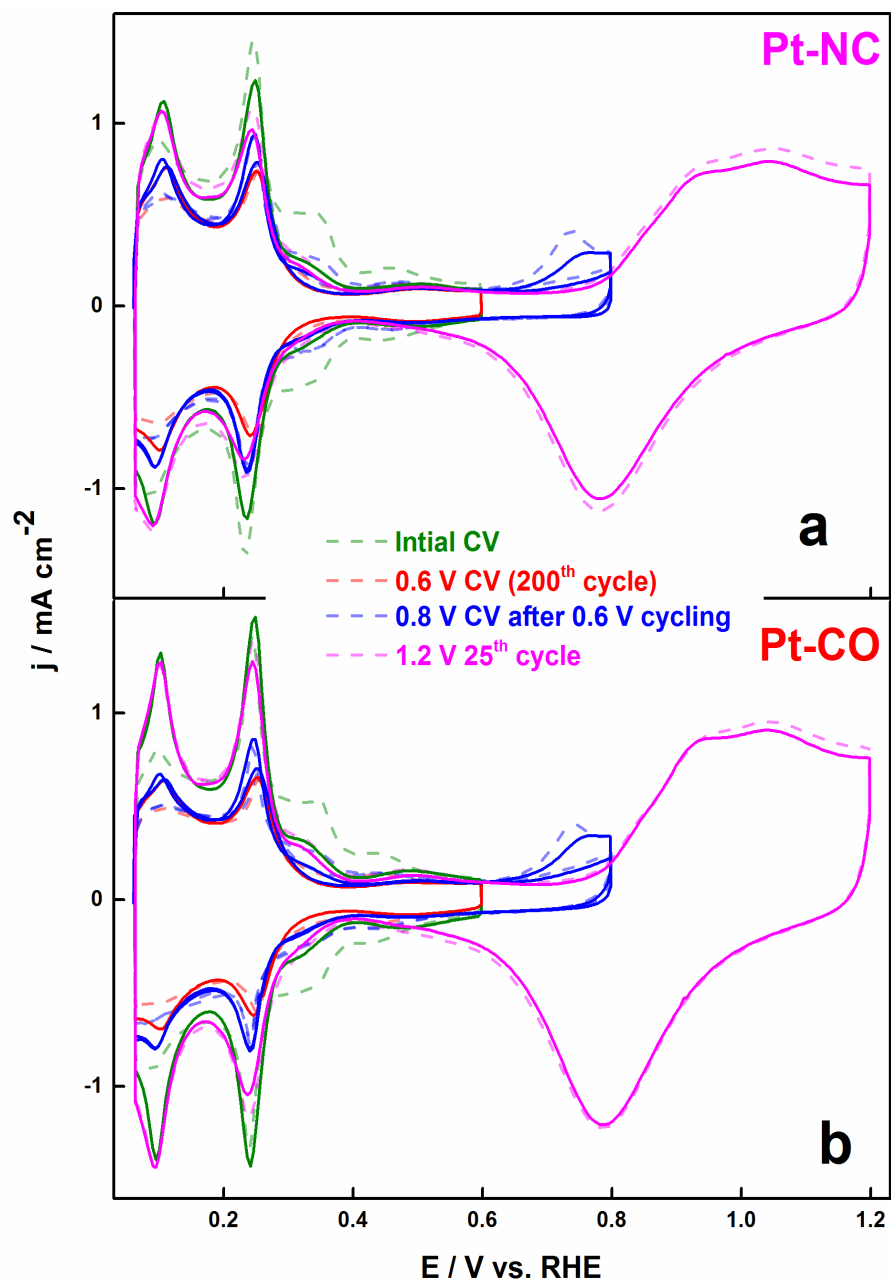

**Fig. S9** Comparison of the CVs (intial and after 0.6 V cycling (200 cycles)) followed by recording the CV upto 0.8 V (2 cycles) and 1.2 V (25<sup>th</sup> cycle) (dotted lines); repeating the sequential experiment on the same electrode (solid lines) for both (a) Pt-NC and (b)Pt-CO.

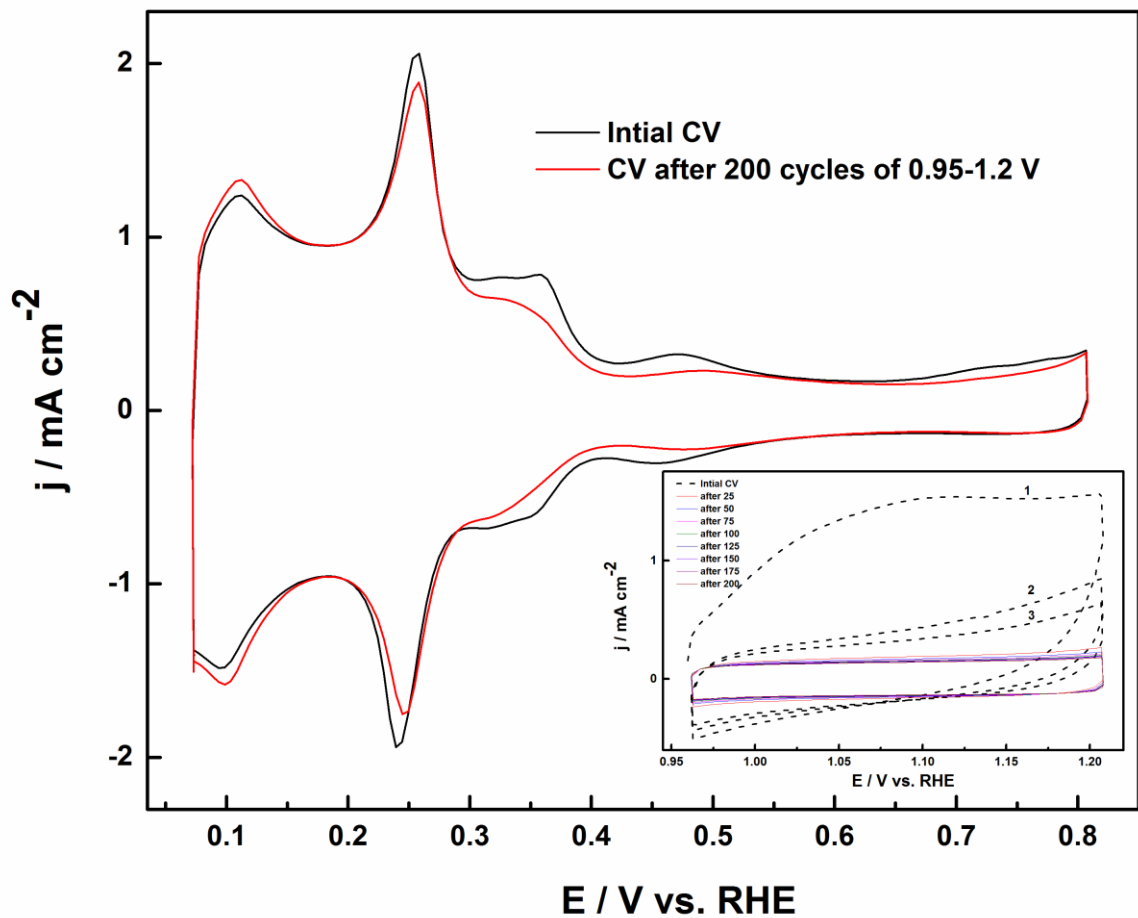

**Fig. S10** Comparison of the CVs of Pt-NC (initial and after cycling in the potential range of 0.95–1.2 V for 200 cycles) in argon-saturated 0.5 M  $\text{H}_2\text{SO}_4$  electrolyte recorded at a scan rate of  $50 \text{ mV s}^{-1}$ . Inset shows the complete cycling between (0.95–1.2 V)(200 cycles).

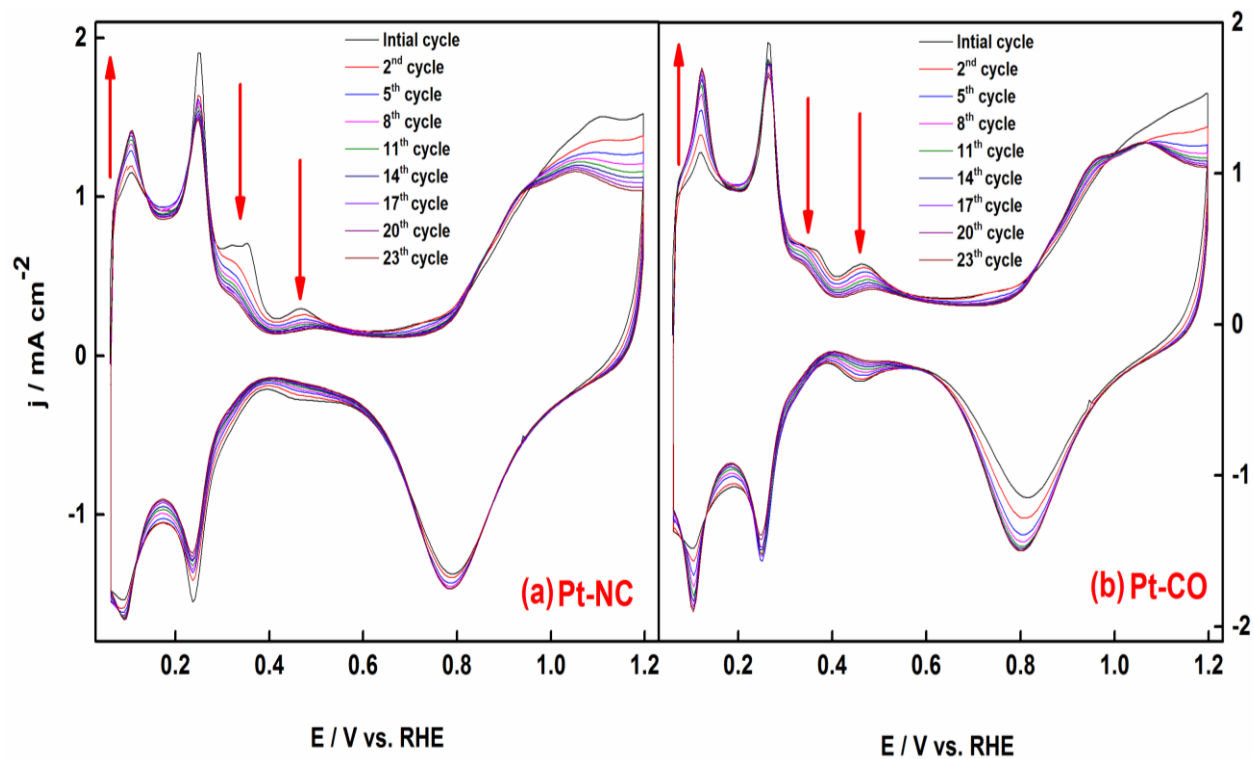

**Fig. S11** Initial cycling of Pt-NC (a) and Pt-CO (b) nanoparticles upto 1.2 V in argon-saturated 0.5 M  $H_2SO_4$  electrolytes recorded at a scan rate of  $50\text{ mV s}^{-1}$ .

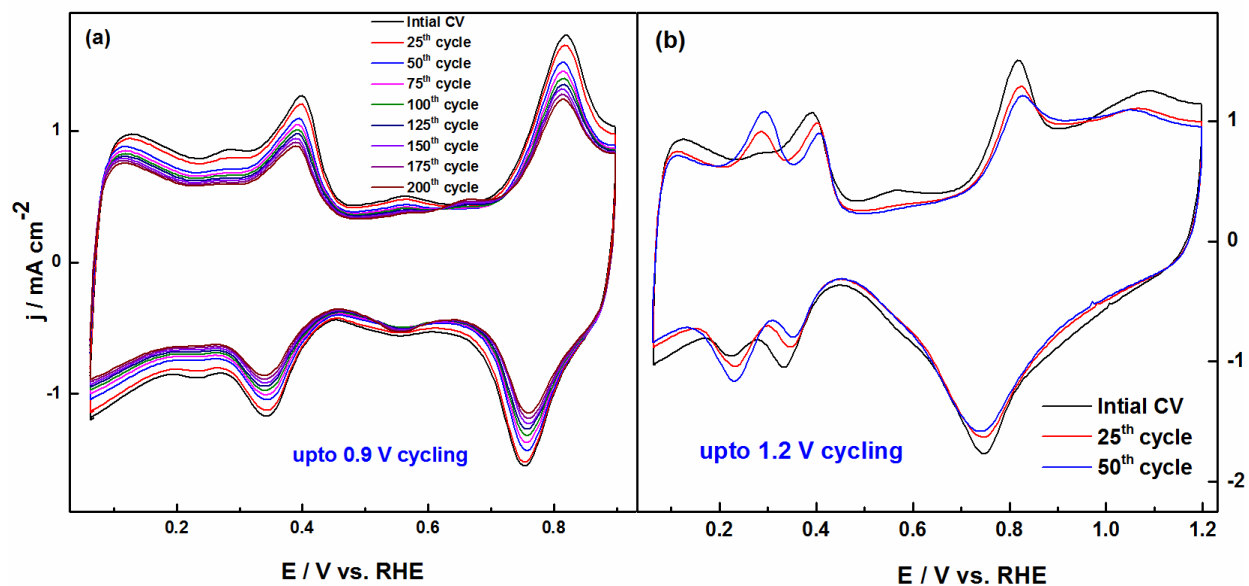

**Fig. S12** Voltammograms of Pt-NC nanoparticles upto (a) 0.9 V and (b) 1.2 V (25<sup>th</sup> cycle upto 200<sup>th</sup> cycle) in argon-saturated 0.1 M NaOH electrolyte recorded at a scan rate of  $50 \text{ mV s}^{-1}$ .

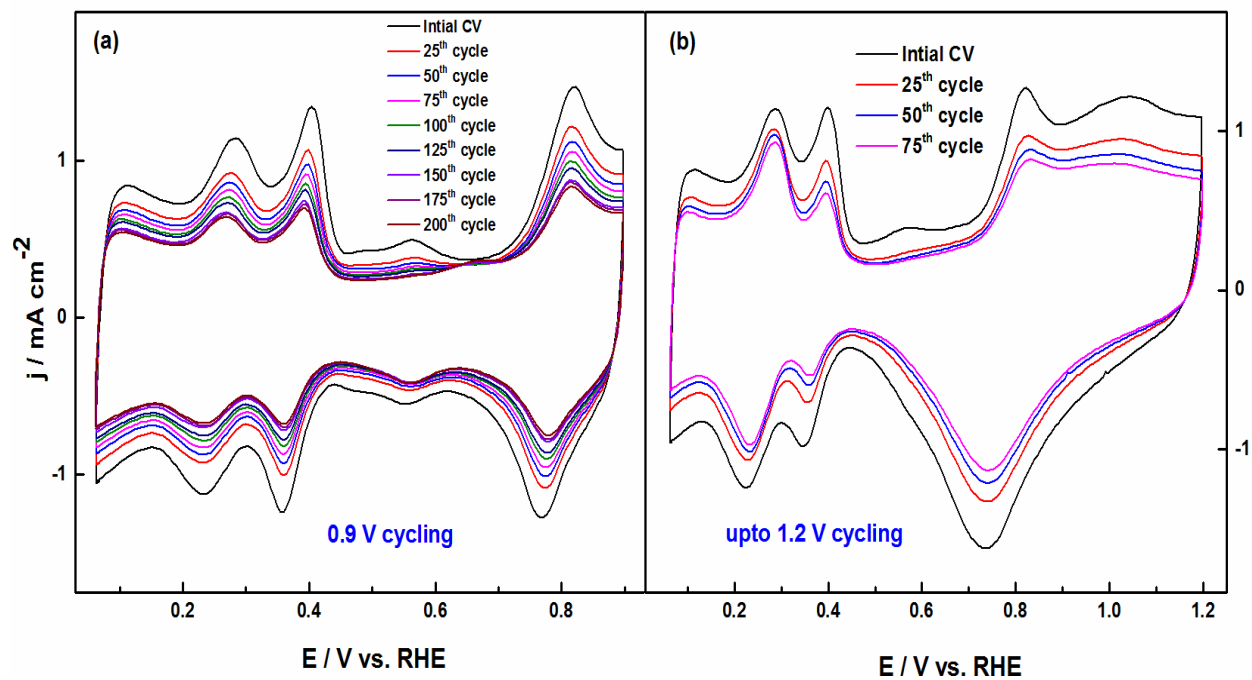

**Fig. S13** Voltammograms of Pt-CO nanoparticles upto (a ) 0.9 V and (b) 1.2 V (25<sup>th</sup> cycle upto 200<sup>th</sup> cycle) in argon-saturated 0.1 M NaOH electrolyte recorded at a scan rate of 50 mV s<sup>-1</sup>.
